# Supplementary material for: Lower SARS-CoV-2–specific humoral immunity in people living with HIV-1 recovered from nonhospitalized COVID-19
Source: JCI journal article supplement (doi:10.1172/jci.insight.158402), 2022-09-22
Supplement: sd1 [file 1]

1 **Supplemental Figure S1: SARS-CoV-2-specific IgG1 Response Magnitudes at Enrollment by Responder Status Relative to**  
2 **the Positivity Cutoff** IgG1 magnitudes are shown for positive (red) and negative (blue) responders in Figure 1A. Pre-specified  
3 positivity cutoffs are displayed for each antigen at the top of each panel and with a red dashed line. Clear separation is present at the  
4 1:50 dilution used to make the positivity calls. At the 1:1000 dilution, the visual overlap with non-responders is below the antigen  
5 specific cutoff.

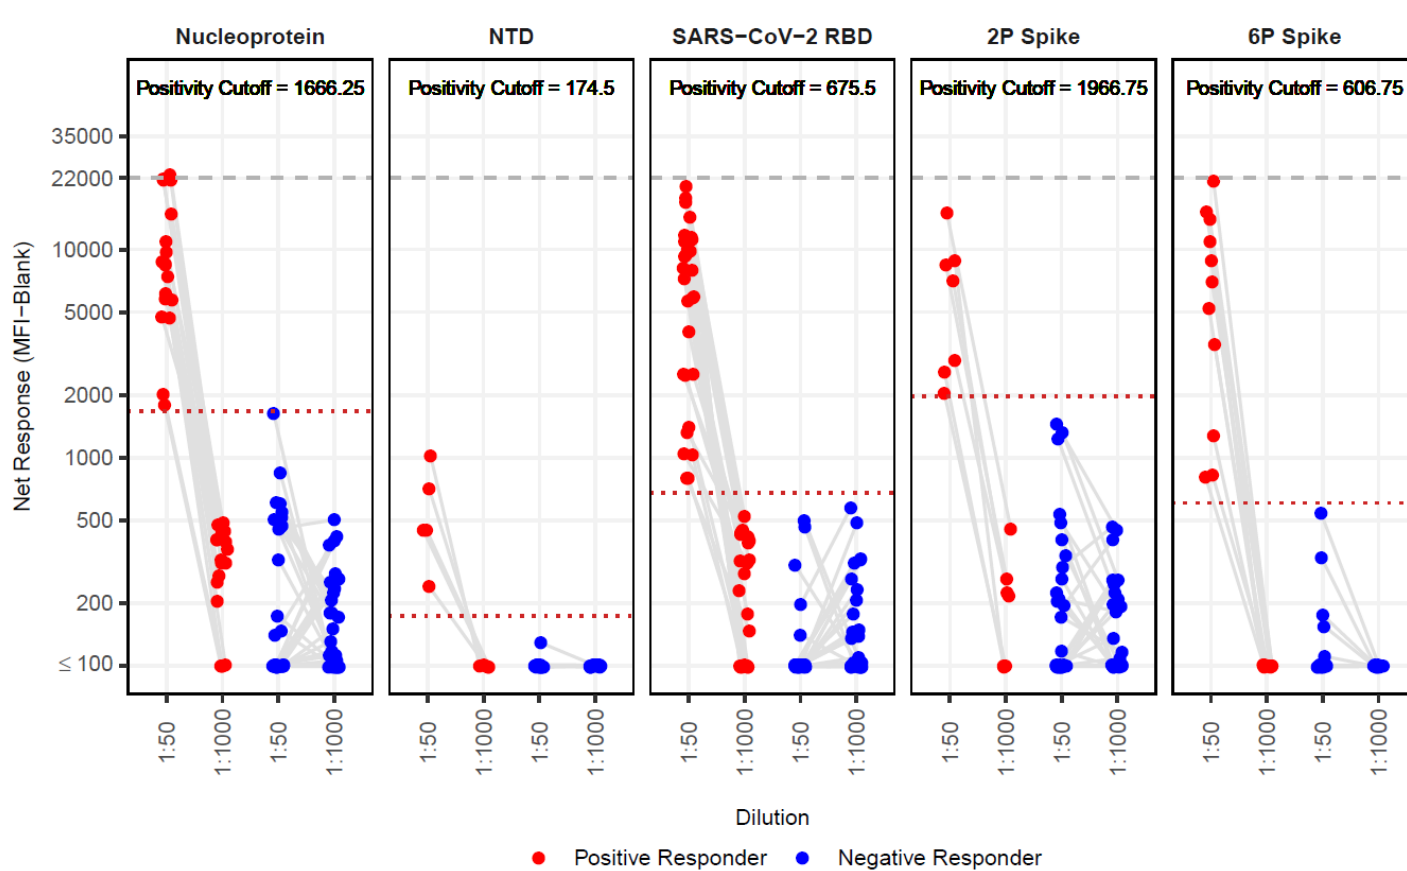

7 **Supplemental Figure S2: SARS-CoV-2-specific IgA Response Rates and Magnitudes at Enrollment by HIV Serostatus**

8 SARS-CoV-2-specific antigens are listed at the top of each column. Response rates are shown at the top of each box plot along with

9 the number tested. Positive responders are depicted by colored dots (PWOH in red, PLWH in blue), and non-responders are

10 depicted by gray triangles. Boxplots represent the distribution of magnitudes for the positive responders only. Response magnitude

11 is shown as Net Response in mean fluorescent intensity (MFI). Log-linear regression adjusting for peak COVID-19 symptom severity,

12 diabetes, hypertension, COPD/emphysema/asthma, current and ever smoking, age, sex, BMI race/ethnicity, region, and days since

13 SARS-CoV-2 diagnosis was used. Significant differences in the response rates and magnitudes were not detected at the  $p \leq 0.05$

14 and  $q \leq 0.2$  levels.

15

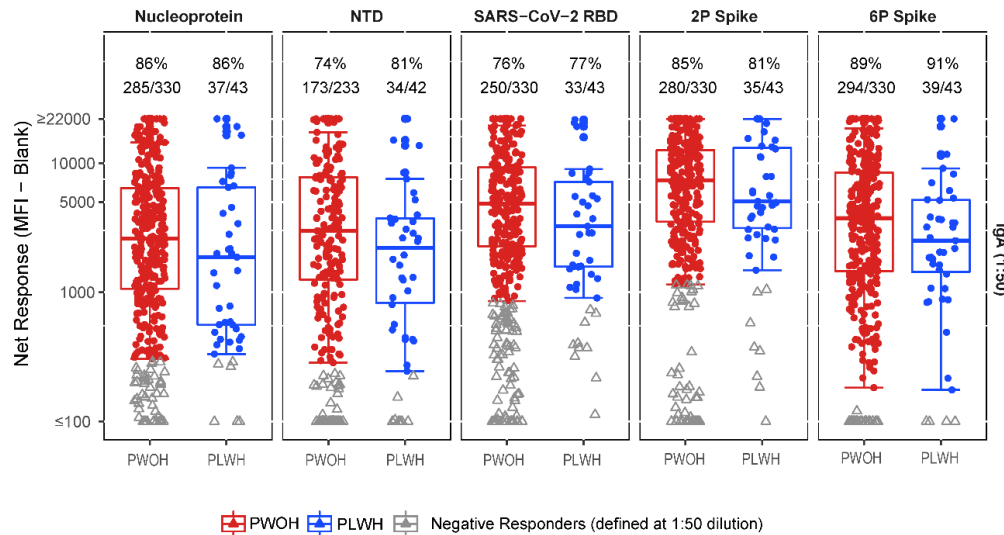

16 **Supplemental Figure S3: SARS-CoV-2-specific IgA Response Rates and Magnitudes at Enrollment by HIV Serostatus and**  
17 **Peak COVID-19 Symptom Severity**

18 SARS-CoV-2-specific antigens are listed at the top of each column. Response rates are shown at the top of each box-and-whisker  
19 plot along with the number tested. PWOH are shown on the left of each subpanel, and PLWH are shown on the right. Colored  
20 dots/boxes designate peak symptom severity (asymptomatic = blue, symptomatic outpatient = red, hospitalized = teal). Gray  
21 triangles = non-responders. Boxplots represent the distribution for the positive responders only (number tested - PLWH IgA  
22 Asymptomatic/Symptomatic Outpatient/Hospitalized: N 9/16/18, NTD 9/15/18, RBD 9/16/18, 2P 9/16/18, 6P 9/16/18; PWOH IgA  
23 Asymptomatic/Symptomatic Outpatient/ Hospitalized: N 65/133/132 , NTD 55/75/103, RBD 65/133/132, 2P 65/133/132, 6P  
24 65/133/132). Response magnitude is shown as Net Response in mean fluorescent intensity (MFI). Log-linear regression adjusting for  
25 peak COVID-19 symptom severity, diabetes, hypertensions, COPD/emphysema/asthma, current and ever smoking, age, sex, BMI  
26 race/ethnicity, region, and days since SARS-CoV-2 diagnosis was used. Significant differences in the response rates and

27 magnitudes were not detected at the  $p \leq 0.05$  and  $q \leq 0.2$  levels. For within group significances between peak COVID-19 symptom  
 28 severities, see Tables S5 and S6.

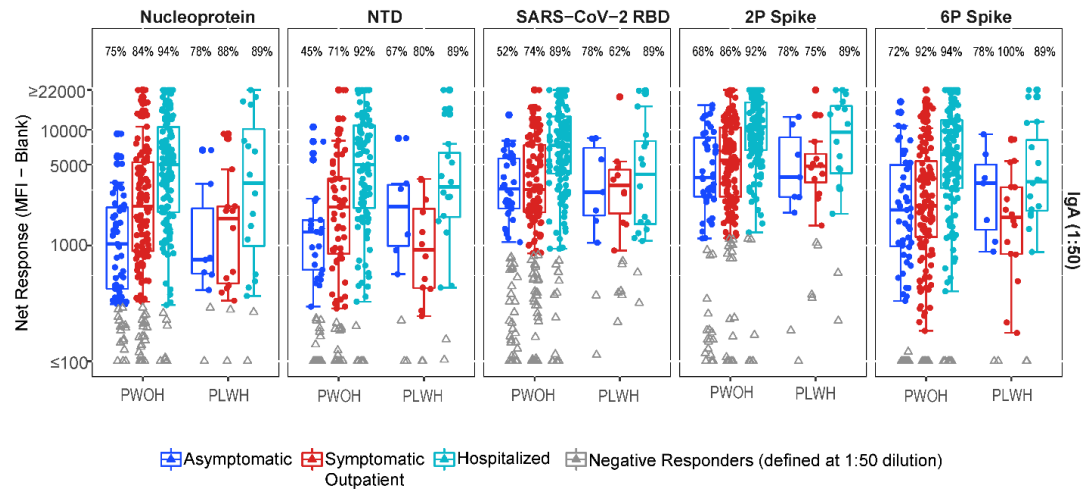

29

30 **Supplemental Figure S4: Polar Plots of Response Rates to SARS-CoV-2 Antigens at Enrollment by HIV Serostatus and Peak**  
31 **COVID-19 Severity**

32 Each plot represents a specific HIV serostatus and peak COVID-19 symptom severity. Isotypes/subclasses, ACE2 blocking, and  
33 ADCP are shown around the perimeter. Response rate (%) towards antigens are represented by colored rays. All participant data is  
34 included.

35

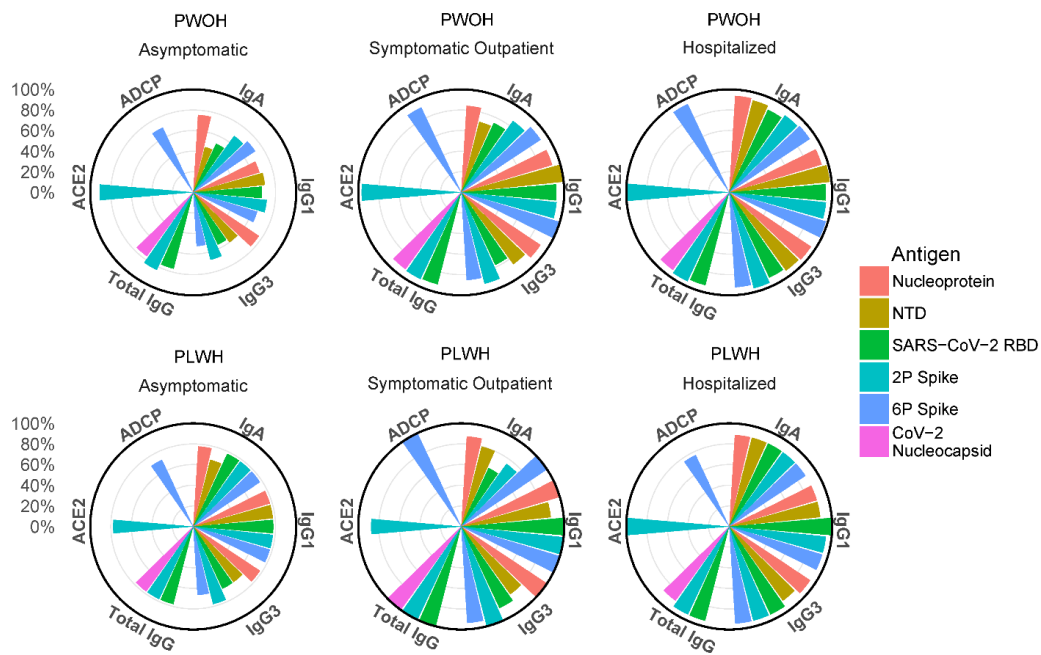

36

37

38

39 **Supplemental Figure S5: Polar Plots of Mean Percentile of Response Magnitudes to SARS-CoV-2 Antigens at Enrollment by**  
40 **HIV Serostatus and COVID-19 Severity**

41 Each plot represents a specific HIV serostatus and peak COVID-19 symptom severity. Isotypes/subclasses, ACE2 blocking, and  
42 ADCP are shown around the perimeter. Group mean percentile response magnitudes towards antigens are represented by colored  
43 rays. Response magnitudes were first ranked and then scaled from 0 to 1 for each antigen-antibody combination. Red circles at the  
44 0.4 ring emphasize differences between asymptomatic and symptomatic outpatient group responses. All participant data is included.

45

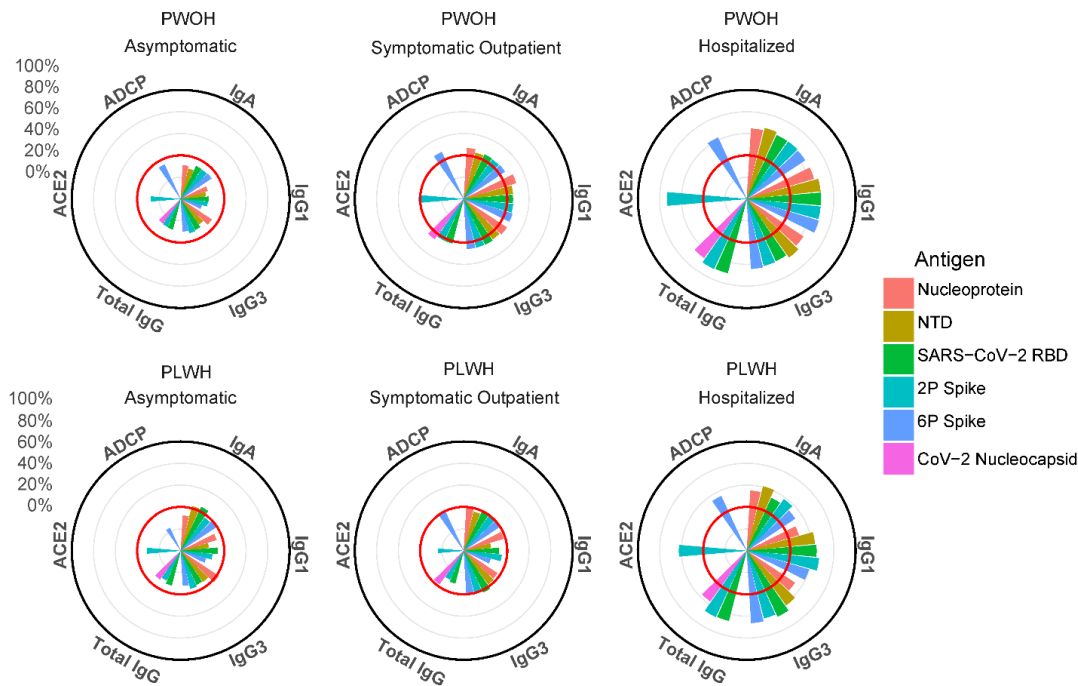

46

47 **Supplemental Table 1: Association of HIV status with binding antibody responses adjusting for COVID-19**  
 48 **severity, demographics, pre-existing medical conditions, smoking history, region, and days since SARS-CoV-2**  
 49 **diagnosis**

| Isotype | Antigen             | Response Rate |                      |              |              | Response Magnitudes among Positive Responders |                     |              |              |
|---------|---------------------|---------------|----------------------|--------------|--------------|-----------------------------------------------|---------------------|--------------|--------------|
|         |                     | OR*           | 95% CI               | P-value      | Q-value      | GMR*                                          | 95% CI              | P-value      | Q-value      |
| IgG1    | SARS-CoV-2 RBD      | 3.65          | [0.97, 20.51]        | 0.057        | 0.245        | 0.75                                          | [0.5, 1.14]         | 0.184        | 0.307        |
|         | SARS-CoV-2 Nucl     | 2.41          | [0.75, 9.42]         | 0.147        | 0.245        | 0.65                                          | [0.42, 1.01]        | 0.055        | 0.138        |
|         | SARS-CoV-2 2P Spike | 2.18          | [0.64, 9.66]         | 0.226        | 0.282        | 0.99                                          | [0.72, 1.37]        | 0.969        | 0.969        |
|         | SARS-CoV-2-NTD      | 0.69          | [0.16, 3.1]          | 0.616        | 0.616        | 0.73                                          | [0.43, 1.25]        | 0.252        | 0.315        |
|         | SARS-CoV-2 6P Spike | 3.6           | [0.67, 25.58]        | 0.141        | 0.245        | <b>0.63</b>                                   | <b>[0.4, 1]</b>     | <b>0.05</b>  | <b>0.138</b> |
| IgG3    | SARS-CoV-2 RBD      | <b>2.81</b>   | <b>[1.05, 8.68]</b>  | <b>0.039</b> | <b>0.097</b> | 0.95                                          | [0.71, 1.29]        | 0.758        | 0.809        |
|         | SARS-CoV-2 Nucl     | 2.25          | [0.66, 9.99]         | 0.207        | 0.259        | 0.88                                          | [0.64, 1.21]        | 0.429        | 0.809        |
|         | SARS-CoV-2 2P Spike | 2.88          | [0.84, 12.87]        | 0.097        | 0.162        | 0.97                                          | [0.73, 1.28]        | 0.809        | 0.809        |
|         | SARS-CoV-2-NTD      | 1.46          | [0.55, 4.27]         | 0.459        | 0.459        | 0.89                                          | [0.58, 1.34]        | 0.573        | 0.809        |
|         | SARS-CoV-2 6P Spike | <b>3.23</b>   | <b>[1.09, 11.39]</b> | <b>0.033</b> | <b>0.097</b> | 0.8                                           | [0.57, 1.12]        | 0.195        | 0.809        |
| IgG     | CoV-2 Nucleoprotein | 2.21          | [0.64, 9.41]         | 0.221        | 0.332        | 0.64                                          | [0.4, 1.04]         | 0.071        | 0.106        |
|         | CoV-2 RBD           | 2.59          | [0.7, 12.47]         | 0.163        | 0.332        | <b>0.63</b>                                   | <b>[0.42, 0.96]</b> | <b>0.031</b> | <b>0.093</b> |
|         | CoV-2 2P Spike      | 1.83          | [0.48, 8.89]         | 0.394        | 0.394        | 0.71                                          | [0.45, 1.14]        | 0.155        | 0.155        |

|     |                     |      |              |       |       |      |              |       |       |
|-----|---------------------|------|--------------|-------|-------|------|--------------|-------|-------|
| IgA | SARS-CoV-2 RBD      | 1.12 | [0.46, 2.89] | 0.803 | 0.927 | 0.8  | [0.6, 1.05]  | 0.112 | 0.281 |
|     | SARS-CoV-2 Nucl     | 0.83 | [0.3, 2.52]  | 0.73  | 0.927 | 0.9  | [0.63, 1.3]  | 0.586 | 0.645 |
|     | SARS-CoV-2 2P Spike | 0.96 | [0.38, 2.6]  | 0.927 | 0.927 | 0.94 | [0.73, 1.21] | 0.645 | 0.645 |
|     | SARS-CoV-2-NTD      | 1.79 | [0.65, 5.46] | 0.27  | 0.833 | 0.86 | [0.59, 1.26] | 0.445 | 0.645 |
|     | SARS-CoV-2 6P Spike | 1.78 | [0.57, 6.69] | 0.333 | 0.833 | 0.76 | [0.54, 1.05] | 0.098 | 0.281 |

50 \*: OR=Odds Ratio, †: GMR=Geometric Mean Ratio; Nucl is short for Nucleoprotein; Bold values are significant (p-value≤0.05 and q-value≤0.2)

51



52 **Supplemental Table 2: Association of HIV status with binding antibody responses stratified by COVID-19**  
53 **severity adjusting for demographics, pre-existing medical conditions, smoking history, region, and days since**  
54 **SARS-CoV-2 diagnosis**

| Isotype | Antigen                  | Comparison      | Response Rate |         |         |         | Response Magnitudes |               |              |             |
|---------|--------------------------|-----------------|---------------|---------|---------|---------|---------------------|---------------|--------------|-------------|
|         |                          |                 | OR            | 95% CI  | P-value | Q-value | GMR                 | 95% CI        | P-value      | Q-value     |
| IgG1    | SARS-CoV-2 RBD           | PLWH vs PWOH in | 1.59          | [0.26,  | 0.612   | 0.921   | 2.7                 | [1.02,        | 0.046        | 0.138       |
|         |                          | Asymptomatic    |               | 9.69]   |         |         |                     | 7.15]         |              |             |
|         | SARS-CoV-2 Nucleoprotein | PLWH vs PWOH in | 5.66          | [0.28,  | 0.256   | 0.73    | <b>0.41</b>         | <b>[0.22,</b> | <b>0.005</b> | <b>0.02</b> |
|         |                          | Symptomatic     |               | 112.66] |         |         |                     | <b>0.77]</b>  |              |             |
|         | SARS-CoV-2 Spike         | PLWH vs PWOH in | 5.18          | [0.27,  | 0.276   | 0.73    | 0.84                | [0.47,        | 0.577        | 0.665       |
|         |                          | Hospitalized    |               | 100.16] |         |         |                     | 1.53]         |              |             |
| IgG1    | SARS-CoV-2 RBD           | PLWH vs PWOH in | 1.98          | [0.32,  | 0.465   | 0.921   | 2.17                | [0.79,        | 0.133        | 0.284       |
|         |                          | Asymptomatic    |               | 12.47]  |         |         |                     | 5.98]         |              |             |
|         | SARS-CoV-2 Nucleoprotein | PLWH vs PWOH in | 8.3           | [0.42,  | 0.166   | 0.73    | <b>0.38</b>         | <b>[0.2,</b>  | <b>0.004</b> | <b>0.02</b> |
|         |                          | Symptomatic     |               | 165.7]  |         |         |                     | <b>0.74]</b>  |              |             |
|         | SARS-CoV-2 Spike         | PLWH vs PWOH in | 0.93          | [0.16,  | 0.936   | 0.936   | 0.7                 | [0.37,        | 0.266        | 0.467       |
|         |                          | Hospitalized    |               | 5.36]   |         |         |                     | 1.32]         |              |             |
| IgG1    | SARS-CoV-2 2P            | PLWH vs PWOH in | 1.33          | [0.22,  | 0.755   | 0.936   | 1.86                | [0.88,        | 0.103        | 0.257       |
|         |                          | Asymptomatic    |               | 8.17]   |         |         |                     | 3.93]         |              |             |

| Isotype | Antigen             | Comparison                   | Response Rate |               |         |         | Response Magnitudes |                    |                  |              |
|---------|---------------------|------------------------------|---------------|---------------|---------|---------|---------------------|--------------------|------------------|--------------|
|         |                     |                              | OR            | 95% CI        | P-value | Q-value | GMR                 | 95% CI             | P-value          | Q-value      |
|         |                     | PLWH vs PWOH in Symptomatic  | 4.91          | [0.25, 94.87] | 0.292   | 0.73    | 0.8                 | [0.49, 1.3]        | 0.372            | 0.503        |
|         |                     | PLWH vs PWOH in Hospitalized | 1.43          | [0.2, 10.53]  | 0.723   | 0.936   | 0.97                | [0.61, 1.54]       | 0.888            | 0.951        |
|         | SARS-CoV-2-NTD      | PLWH vs PWOH in Asymptomatic | 2             | [0.22, 18.48] | 0.54    | 0.921   | 1.68                | [0.5, 5.66]        | 0.402            | 0.503        |
|         |                     | PLWH vs PWOH in Symptomatic  | 0.13          | [0.01, 1.48]  | 0.101   | 0.73    | <b>0.23</b>         | <b>[0.1, 0.51]</b> | <b>&lt;0.001</b> | <b>0.003</b> |
|         |                     | PLWH vs PWOH in Hospitalized | 0.78          | [0.09, 6.92]  | 0.82    | 0.936   | 1.4                 | [0.67, 2.91]       | 0.373            | 0.503        |
|         | SARS-CoV-2 6P Spike | PLWH vs PWOH in Asymptomatic | 4.32          | [0.5, 37.11]  | 0.183   | 0.73    | 1.81                | [0.62, 5.3]        | 0.28             | 0.467        |
|         |                     | PLWH vs PWOH in Symptomatic  | 1.19          | [0.04, 31.63] | 0.916   | 0.936   | <b>0.25</b>         | <b>[0.13, 0.5]</b> | <b>&lt;0.001</b> | <b>0.001</b> |
|         |                     | PLWH vs PWOH in Hospitalized | 1.89          | [0.16, 22.18] | 0.614   | 0.921   | 1.01                | [0.54, 1.9]        | 0.975            | 0.975        |
| IgG3    | SARS-CoV-2 RBD      | PLWH vs PWOH in Asymptomatic | 2.44          | [0.47, 12.55] | 0.286   | 0.66    | 0.92                | [0.44, 1.94]       | 0.83             | 0.89         |

| Isotype | Antigen                  | Comparison                   | Response Rate |                |         |         | Response Magnitudes |              |         |         |
|---------|--------------------------|------------------------------|---------------|----------------|---------|---------|---------------------|--------------|---------|---------|
|         |                          |                              | OR            | 95% CI         | P-value | Q-value | GMR                 | 95% CI       | P-value | Q-value |
|         |                          | PLWH vs PWOH in Symptomatic  | 2.81          | [0.59, 13.42]  | 0.194   | 0.66    | 0.69                | [0.43, 1.1]  | 0.122   | 0.452   |
|         |                          | PLWH vs PWOH in Hospitalized | 2.3           | [0.34, 15.66]  | 0.396   | 0.66    | 1.25                | [0.82, 1.92] | 0.3     | 0.643   |
|         | SARS-CoV-2 Nucleoprotein | PLWH vs PWOH in Asymptomatic | 1.05          | [0.17, 6.54]   | 0.958   | 0.964   | 1.9                 | [0.89, 4.02] | 0.095   | 0.452   |
|         |                          | PLWH vs PWOH in Symptomatic  | 6.67          | [0.32, 138.28] | 0.22    | 0.66    | 0.68                | [0.41, 1.11] | 0.12    | 0.452   |
|         |                          | PLWH vs PWOH in Hospitalized | 1.7           | [0.21, 13.75]  | 0.618   | 0.843   | 0.85                | [0.53, 1.35] | 0.484   | 0.726   |
|         | SARS-CoV-2 2P Spike      | PLWH vs PWOH in Asymptomatic | 1.91          | [0.32, 11.52]  | 0.481   | 0.721   | 1.08                | [0.56, 2.11] | 0.818   | 0.89    |
|         |                          | PLWH vs PWOH in Symptomatic  | 8.41          | [0.42, 168.18] | 0.164   | 0.66    | 0.73                | [0.47, 1.12] | 0.151   | 0.452   |
|         |                          | PLWH vs PWOH in Hospitalized | 1.15          | [0.14, 9.36]   | 0.893   | 0.964   | 1.19                | [0.79, 1.8]  | 0.402   | 0.726   |
|         | SARS-CoV-2-NTD           | PLWH vs PWOH in Asymptomatic | 2.25          | [0.42, 12.12]  | 0.347   | 0.66    | 1.32                | [0.48, 3.64] | 0.597   | 0.814   |

| Isotype | Antigen             | Comparison                   | Response Rate |                |         |         | Response Magnitudes |              |         |         |
|---------|---------------------|------------------------------|---------------|----------------|---------|---------|---------------------|--------------|---------|---------|
|         |                     |                              | OR            | 95% CI         | P-value | Q-value | GMR                 | 95% CI       | P-value | Q-value |
|         |                     | PLWH vs PWOH in Symptomatic  | 1.09          | [0.25, 4.78]   | 0.913   | 0.964   | 0.64                | [0.33, 1.24] | 0.183   | 0.458   |
|         |                     | PLWH vs PWOH in Hospitalized | 1.04          | [0.19, 5.67]   | 0.964   | 0.964   | 1.02                | [0.56, 1.87] | 0.943   | 0.943   |
|         | SARS-CoV-2 6P Spike | PLWH vs PWOH in Asymptomatic | 2.91          | [0.54, 15.54]  | 0.212   | 0.66    | 0.72                | [0.31, 1.69] | 0.448   | 0.726   |
|         |                     | PLWH vs PWOH in Symptomatic  | 3.23          | [0.47, 22.12]  | 0.232   | 0.66    | 0.57                | [0.34, 0.95] | 0.033   | 0.452   |
|         |                     | PLWH vs PWOH in Hospitalized | 2.37          | [0.33, 17.15]  | 0.393   | 0.66    | 1.11                | [0.68, 1.81] | 0.677   | 0.846   |
| IgG     | CoV-2 Nucleoprotein | PLWH vs PWOH in Asymptomatic | 1.56          | [0.21, 11.7]   | 0.664   | 0.904   | 1.03                | [0.31, 3.35] | 0.966   | 0.966   |
|         |                     | PLWH vs PWOH in Symptomatic  | 7.03          | [0.37, 133.39] | 0.194   | 0.78    | 0.52                | [0.25, 1.06] | 0.072   | 0.217   |
|         |                     | PLWH vs PWOH in Hospitalized | 1.12          | [0.19, 6.57]   | 0.904   | 0.904   | 0.67                | [0.33, 1.37] | 0.278   | 0.468   |
|         | CoV-2 RBD           | PLWH vs PWOH in Asymptomatic | 1.2           | [0.16, 8.96]   | 0.857   | 0.904   | 1.59                | [0.58, 4.34] | 0.364   | 0.468   |

| Isotype | Antigen                  | Comparison                   | Response Rate |                |         |         | Response Magnitudes |                     |              |              |
|---------|--------------------------|------------------------------|---------------|----------------|---------|---------|---------------------|---------------------|--------------|--------------|
|         |                          |                              | OR            | 95% CI         | P-value | Q-value | GMR                 | 95% CI              | P-value      | Q-value      |
|         |                          | PLWH vs PWOH in Symptomatic  | 6.98          | [0.36, 136.77] | 0.201   | 0.78    | <b>0.43</b>         | <b>[0.23, 0.78]</b> | <b>0.006</b> | <b>0.053</b> |
|         |                          | PLWH vs PWOH in Hospitalized | 1.99          | [0.25, 15.67]  | 0.514   | 0.904   | 0.69                | [0.38, 1.26]        | 0.227        | 0.468        |
|         | CoV-2 2P Spike           | PLWH vs PWOH in Asymptomatic | 0.85          | [0.11, 6.6]    | 0.873   | 0.904   | 1.73                | [0.56, 5.29]        | 0.337        | 0.468        |
|         |                          | PLWH vs PWOH in Symptomatic  | 5.56          | [0.28, 110.24] | 0.26    | 0.78    | <b>0.41</b>         | <b>[0.21, 0.82]</b> | <b>0.012</b> | <b>0.054</b> |
|         |                          | PLWH vs PWOH in Hospitalized | 1.34          | [0.17, 10.76]  | 0.784   | 0.904   | 0.9                 | [0.46, 1.75]        | 0.747        | 0.84         |
| IgA     | SARS-CoV-2 RBD           | PLWH vs PWOH in Asymptomatic | 3.15          | [0.53, 18.58]  | 0.206   | 0.947   | 1.27                | [0.68, 2.37]        | 0.454        | 0.68         |
|         |                          | PLWH vs PWOH in Symptomatic  | 0.62          | [0.17, 2.22]   | 0.462   | 0.947   | 0.8                 | [0.49, 1.31]        | 0.381        | 0.68         |
|         |                          | PLWH vs PWOH in Hospitalized | 0.95          | [0.19, 4.78]   | 0.947   | 0.947   | 0.68                | [0.46, 0.99]        | 0.047        | 0.36         |
|         | SARS-CoV-2 Nucleoprotein | PLWH vs PWOH in Asymptomatic | 0.81          | [0.13, 5.15]   | 0.825   | 0.947   | 1.2                 | [0.54, 2.65]        | 0.657        | 0.758        |

| Isotype | Antigen             | Comparison                   | Response Rate |               |         |         | Response Magnitudes |              |         |         |
|---------|---------------------|------------------------------|---------------|---------------|---------|---------|---------------------|--------------|---------|---------|
|         |                     |                              | OR            | 95% CI        | P-value | Q-value | GMR                 | 95% CI       | P-value | Q-value |
|         |                     | PLWH vs PWOH in Symptomatic  | 1.07          | [0.22, 5.22]  | 0.93    | 0.947   | 0.76                | [0.43, 1.33] | 0.331   | 0.68    |
|         |                     | PLWH vs PWOH in Hospitalized | 0.47          | [0.09, 2.37]  | 0.359   | 0.947   | 0.94                | [0.56, 1.59] | 0.821   | 0.821   |
|         | SARS-CoV-2 2P Spike | PLWH vs PWOH in Asymptomatic | 1.74          | [0.3, 9.97]   | 0.536   | 0.947   | 1.19                | [0.68, 2.09] | 0.544   | 0.68    |
|         |                     | PLWH vs PWOH in Symptomatic  | 0.64          | [0.17, 2.44]  | 0.511   | 0.947   | 0.94                | [0.61, 1.43] | 0.761   | 0.816   |
|         |                     | PLWH vs PWOH in Hospitalized | 0.79          | [0.15, 4.13]  | 0.782   | 0.947   | 0.87                | [0.61, 1.24] | 0.443   | 0.68    |
|         | SARS-CoV-2-NTD      | PLWH vs PWOH in Asymptomatic | 3.06          | [0.52, 18.06] | 0.218   | 0.947   | 2.27                | [0.92, 5.59] | 0.074   | 0.37    |
|         |                     | PLWH vs PWOH in Symptomatic  | 1.71          | [0.36, 8.04]  | 0.498   | 0.947   | 0.59                | [0.32, 1.11] | 0.103   | 0.387   |
|         |                     | PLWH vs PWOH in Hospitalized | 0.81          | [0.14, 4.55]  | 0.808   | 0.947   | 0.85                | [0.51, 1.42] | 0.541   | 0.68    |
|         | SARS-CoV-2 6P Spike | PLWH vs PWOH in Asymptomatic | 1.38          | [0.23, 8.23]  | 0.725   | 0.947   | 1.48                | [0.69, 3.2]  | 0.318   | 0.68    |

| Isotype | Antigen | Comparison                   | Response Rate |                |         |         | Response Magnitudes |              |         |         |
|---------|---------|------------------------------|---------------|----------------|---------|---------|---------------------|--------------|---------|---------|
|         |         |                              | OR            | 95% CI         | P-value | Q-value | GMR                 | 95% CI       | P-value | Q-value |
|         |         | PLWH vs PWOH in Symptomatic  | 5.92          | [0.31, 113.77] | 0.238   | 0.947   | 0.6                 | [0.37, 1]    | 0.048   | 0.36    |
|         |         | PLWH vs PWOH in Hospitalized | 0.8           | [0.15, 4.42]   | 0.801   | 0.947   | 0.73                | [0.45, 1.19] | 0.213   | 0.638   |

55 \*: OR=Odds Ratio, †: GMR=Geometric Mean Ratio; Bold values are significant (p-value≤0.05 and q-value≤0.2). Response magnitudes include  
56 only positive responders.

57

58 **Supplemental Table 3: Association of Peak COVID-19 severity with binding antibody responses adjusting for**  
 59 **demographics, pre-existing medical conditions, smoking history, region, and days since SARS-CoV-2 diagnosis**  
 60 **in PWOH participants**

| Isotype | Antigen       | Comparison           | Response Rate |                     |                  |              | Response Magnitudes |                    |                  |                  |
|---------|---------------|----------------------|---------------|---------------------|------------------|--------------|---------------------|--------------------|------------------|------------------|
|         |               |                      | OR            | 95% CI              | P-value          | Q-value      | GMR                 | 95% CI             | P-value          | Q-value          |
| IgG1    | SARS-CoV-2    | Symptomatic vs       | <b>6.17</b>   | <b>[2.27,</b>       | <b>&lt;0.001</b> | <b>0.001</b> | <b>2.63</b>         | <b>[1.7, 4.09]</b> | <b>&lt;0.001</b> | <b>&lt;0.001</b> |
|         | RBD           | Asymptomatic in PWOH |               | <b>16.77]</b>       |                  |              |                     |                    |                  |                  |
|         |               | Hospitalized vs      | 2.1           | [0.75, 5.88]        | 0.156            | 0.229        | <b>2.29</b>         | <b>[1.65,</b>      | <b>&lt;0.001</b> | <b>&lt;0.001</b> |
|         |               | Symptomatic in PWOH  |               |                     |                  |              | <b>3.17]</b>        |                    |                  |                  |
|         | SARS-CoV-2    | Symptomatic vs       | <b>4.72</b>   | <b>[1.75,</b>       | <b>0.002</b>     | <b>0.004</b> | <b>3.71</b>         | <b>[2.37,</b>      | <b>&lt;0.001</b> | <b>&lt;0.001</b> |
|         | Nucleoprotein | Asymptomatic in PWOH |               | <b>12.69]</b>       |                  |              |                     | <b>5.81]</b>       |                  |                  |
|         |               | Hospitalized vs      | 2.11          | [0.74, 5.96]        | 0.16             | 0.229        | <b>1.59</b>         | <b>[1.13,</b>      | <b>0.007</b>     | <b>0.007</b>     |
|         |               | Symptomatic in PWOH  |               |                     |                  |              | <b>2.22]</b>        |                    |                  |                  |
|         | SARS-CoV-2 2P | Symptomatic vs       | <b>5.8</b>    | <b>[2.04, 16.5]</b> | <b>0.001</b>     | <b>0.002</b> | <b>1.84</b>         | <b>[1.32,</b>      | <b>&lt;0.001</b> | <b>&lt;0.001</b> |
|         | Spike         | Asymptomatic in PWOH |               |                     |                  |              |                     | <b>2.55]</b>       |                  |                  |
|         |               | Hospitalized vs      | 1.94          | [0.67, 5.61]        | 0.218            | 0.273        | <b>1.73</b>         | <b>[1.35,</b>      | <b>&lt;0.001</b> | <b>&lt;0.001</b> |
|         |               | Symptomatic in PWOH  |               |                     |                  |              | <b>2.22]</b>        |                    |                  |                  |
|         | SARS-CoV-2-   | Symptomatic vs       | <b>60.27</b>  | <b>[6.89,</b>       | <b>&lt;0.001</b> | <b>0.001</b> | <b>5.02</b>         | <b>[2.68,</b>      | <b>&lt;0.001</b> | <b>&lt;0.001</b> |
|         | NTD           | Asymptomatic in PWOH |               | <b>526.91]</b>      |                  |              |                     | <b>9.39]</b>       |                  |                  |



| Isotype | Antigen                  | Comparison                          | Response Rate |               |         |         | Response Magnitudes |              |         |         |
|---------|--------------------------|-------------------------------------|---------------|---------------|---------|---------|---------------------|--------------|---------|---------|
|         |                          |                                     | OR            | 95% CI        | P-value | Q-value | GMR                 | 95% CI       | P-value | Q-value |
|         |                          | Hospitalized vs Symptomatic in PWOH | 0.88          | [0.12, 6.58]  | 0.901   | 0.901   | 3.03                | [1.97, 4.66] | <0.001  | <0.001  |
|         | SARS-CoV-2 6P Spike      | Symptomatic vs Asymptomatic in PWOH | 45.32         | [5.9, 348.3]  | <0.001  | 0.001   | 4.61                | [2.63, 8.06] | <0.001  | <0.001  |
|         |                          | Hospitalized vs Symptomatic in PWOH | 1.17          | [0.17, 8.21]  | 0.876   | 0.901   | 2.23                | [1.53, 3.26] | <0.001  | <0.001  |
| IgG3    | SARS-CoV-2 RBD           | Symptomatic vs Asymptomatic in PWOH | 2.64          | [1.2, 5.84]   | 0.016   | 0.027   | 1.57                | [1.12, 2.2]  | 0.009   | 0.011   |
|         |                          | Hospitalized vs Symptomatic in PWOH | 3.43          | [1.52, 7.71]  | 0.003   | 0.007   | 1.46                | [1.15, 1.85] | 0.002   | 0.003   |
|         | SARS-CoV-2 Nucleoprotein | Symptomatic vs Asymptomatic in PWOH | 3.77          | [1.31, 10.91] | 0.014   | 0.027   | 1.7                 | [1.22, 2.37] | 0.002   | 0.003   |
|         |                          | Hospitalized vs Symptomatic in PWOH | 2.55          | [0.87, 7.45]  | 0.088   | 0.088   | 1.78                | [1.38, 2.29] | <0.001  | <0.001  |
|         | SARS-CoV-2 2P Spike      | Symptomatic vs Asymptomatic in PWOH | 5.31          | [1.95, 14.47] | 0.001   | 0.006   | 1.37                | [1.02, 1.85] | 0.036   | 0.04    |
|         |                          | Hospitalized vs Symptomatic in PWOH | 3.32          | [1.07, 10.24] | 0.037   | 0.051   | 1.59                | [1.27, 1.98] | <0.001  | <0.001  |

| Isotype | Antigen             | Comparison                          | Response Rate                       |                     |                      |                  | Response Magnitudes |                     |                     |                  |
|---------|---------------------|-------------------------------------|-------------------------------------|---------------------|----------------------|------------------|---------------------|---------------------|---------------------|------------------|
|         |                     |                                     | OR                                  | 95% CI              | P-value              | Q-value          | GMR                 | 95% CI              | P-value             | Q-value          |
|         | SARS-CoV-2-NTD      | Symptomatic vs Asymptomatic in PWOH | <b>3.83</b>                         | <b>[1.6, 9.15]</b>  | <b>0.003</b>         | <b>0.007</b>     | <b>2.19</b>         | <b>[1.4, 3.42]</b>  | <b>0.001</b>        | <b>0.001</b>     |
|         |                     | Hospitalized vs Symptomatic in PWOH | <b>2.65</b>                         | <b>[1.04, 6.75]</b> | <b>0.041</b>         | <b>0.051</b>     | <b>2.51</b>         | <b>[1.81, 3.47]</b> | <b>&lt;0.001</b>    | <b>&lt;0.001</b> |
|         |                     | SARS-CoV-2 6P Spike                 | Symptomatic vs Asymptomatic in PWOH | <b>5.54</b>         | <b>[2.32, 13.22]</b> | <b>&lt;0.001</b> | <b>0.001</b>        | 1.44                | [0.98, 2.12]        | 0.064            |
| IgG     | CoV-2 Nucleoprotein | Hospitalized vs Symptomatic in PWOH | <b>2.35</b>                         | <b>[0.97, 5.73]</b> | <b>0.06</b>          | <b>0.066</b>     | <b>1.87</b>         | <b>[1.43, 2.44]</b> | <b>&lt;0.001</b>    | <b>&lt;0.001</b> |
|         |                     | Symptomatic vs Asymptomatic in PWOH | 3.56                                | [0.95, 13.35]       | 0.059                | 0.178            | <b>2.7</b>          | <b>[1.44, 5.06]</b> | <b>0.002</b>        | <b>0.002</b>     |
|         |                     | Hospitalized vs Symptomatic in PWOH | 1.42                                | [0.46, 4.42]        | 0.542                | 0.542            | <b>2.49</b>         | <b>[1.64, 3.78]</b> | <b>&lt;0.001</b>    | <b>&lt;0.001</b> |
|         | CoV-2 RBD           | Symptomatic vs Asymptomatic in PWOH | 3.6                                 | [0.96, 13.54]       | 0.058                | 0.178            | <b>2.39</b>         | <b>[1.4, 4.09]</b>  | <b>0.001</b>        | <b>0.002</b>     |
|         |                     | Hospitalized vs Symptomatic in PWOH | 1.48                                | [0.47, 4.67]        | 0.506                | 0.542            | <b>3.53</b>         | <b>[2.48, 5.03]</b> | <b>&lt;0.001</b>    | <b>&lt;0.001</b> |
|         |                     | CoV-2 2P Spike                      | Symptomatic vs Asymptomatic in PWOH | 3.13                | [0.74, 13.29]        | 0.122            | 0.244               | <b>3.41</b>         | <b>[1.88, 6.18]</b> | <b>&lt;0.001</b> |

| Isotype | Antigen                  | Comparison                          | Response Rate |               |         |         | Response Magnitudes |              |         |         |
|---------|--------------------------|-------------------------------------|---------------|---------------|---------|---------|---------------------|--------------|---------|---------|
|         |                          |                                     | OR            | 95% CI        | P-value | Q-value | GMR                 | 95% CI       | P-value | Q-value |
|         |                          | Hospitalized vs Symptomatic in PWOH | 1.88          | [0.53, 6.7]   | 0.332   | 0.497   | 3.18                | [2.14, 4.74] | <0.001  | <0.001  |
| IgA     | SARS-CoV-2 RBD           | Symptomatic vs Asymptomatic in PWOH | 5             | [2.19, 11.41] | <0.001  | 0.001   | 1.53                | [1.15, 2.06] | 0.004   | 0.005   |
|         |                          | Hospitalized vs Symptomatic in PWOH | 2.33          | [1.07, 5.07]  | 0.034   | 0.042   | 1.65                | [1.34, 2.03] | <0.001  | <0.001  |
|         | SARS-CoV-2 Nucleoprotein | Symptomatic vs Asymptomatic in PWOH | 3.2           | [1.29, 7.94]  | 0.012   | 0.02    | 2.71                | [1.9, 3.85]  | <0.001  | <0.001  |
|         |                          | Hospitalized vs Symptomatic in PWOH | 3.07          | [1.2, 7.88]   | 0.02    | 0.028   | 2.07                | [1.58, 2.71] | <0.001  | <0.001  |
|         | SARS-CoV-2 2P Spike      | Symptomatic vs Asymptomatic in PWOH | 4.03          | [1.65, 9.85]  | 0.002   | 0.007   | 1.55                | [1.2, 1.99]  | 0.001   | 0.001   |
|         |                          | Hospitalized vs Symptomatic in PWOH | 2.29          | [0.94, 5.53]  | 0.067   | 0.074   | 1.56                | [1.29, 1.88] | <0.001  | <0.001  |
|         | SARS-CoV-2-NTD           | Symptomatic vs Asymptomatic in PWOH | 4.12          | [1.6, 10.61]  | 0.003   | 0.007   | 1.7                 | [1.06, 2.71] | 0.027   | 0.027   |

| Isotype | Antigen       | Comparison                          | Response Rate |                      |                  |              | Response Magnitudes |                     |                  |                  |
|---------|---------------|-------------------------------------|---------------|----------------------|------------------|--------------|---------------------|---------------------|------------------|------------------|
|         |               |                                     | OR            | 95% CI               | P-value          | Q-value      | GMR                 | 95% CI              | P-value          | Q-value          |
|         |               | Hospitalized vs Symptomatic in PWOH | <b>6.42</b>   | <b>[2.36, 17.5]</b>  | <b>&lt;0.001</b> | <b>0.001</b> | <b>2.45</b>         | <b>[1.76, 3.43]</b> | <b>&lt;0.001</b> | <b>&lt;0.001</b> |
|         | SARS-CoV-2 6P | Symptomatic vs Asymptomatic in PWOH | <b>4.67</b>   | <b>[1.68, 12.99]</b> | <b>0.003</b>     | <b>0.007</b> | <b>1.7</b>          | <b>[1.22, 2.39]</b> | <b>0.002</b>     | <b>0.002</b>     |
|         | Spike         | Hospitalized vs Symptomatic in PWOH | 1.64          | [0.59, 4.54]         | 0.34             | 0.34         | <b>1.85</b>         | <b>[1.43, 2.39]</b> | <b>&lt;0.001</b> | <b>&lt;0.001</b> |

61 †: OR=Odds Ratio, ‡: GMR=Geometric Mean Ratio; Bold values are significant (p-value≤0.05 and q-value≤0.2). Response magnitudes include  
62 only positive responders

63

64 **Supplemental Table 4: Association of Peak COVID-19 severity with binding antibody responses adjusting for**  
 65 **demographics, pre-existing medical conditions, smoking history, region, and days since SARS-CoV-2 diagnosis**  
 66 **in PLWH**

| Isotype | Antigen       | Comparison                          | OR           | Response Rate  |              |              | Response Magnitudes |               |                  |                  |
|---------|---------------|-------------------------------------|--------------|----------------|--------------|--------------|---------------------|---------------|------------------|------------------|
|         |               |                                     |              | 95% CI         | P-value      | Q-value      | GMR                 | 95% CI        | P-value          | Q-value          |
| IgG1    | SARS-CoV-2    | Symptomatic vs                      | <b>34.89</b> | <b>[1.77,</b>  | <b>0.02</b>  | <b>0.065</b> | 1.08                | [0.54,        | 0.836            | 0.836            |
|         | RBD           | Asymptomatic in PLWH                |              | <b>688.11]</b> |              |              |                     | 2.15]         |                  |                  |
|         |               | Hospitalized vs Symptomatic in PLWH | 3.07         | [0.03, 271.63] | 0.624        | 0.775        | <b>12.77</b>        | <b>[3.62,</b> | <b>&lt;0.001</b> | <b>&lt;0.001</b> |
|         |               |                                     |              |                |              |              |                     | <b>45.03]</b> |                  |                  |
|         | SARS-CoV-2    | Symptomatic vs                      | <b>39.14</b> | <b>[1.98,</b>  | <b>0.016</b> | <b>0.065</b> | 1.43                | [0.7,         | 0.33             | 0.472            |
|         | Nucleoprotein | Asymptomatic in PLWH                |              | <b>774.7]</b>  |              |              |                     | 2.91]         |                  |                  |
|         |               | Hospitalized vs Symptomatic in PLWH | 0.47         | [0.01, 21.36]  | 0.697        | 0.775        | <b>6.25</b>         | <b>[1.69,</b> | <b>0.006</b>     | <b>0.012</b>     |
|         |               |                                     |              |                |              |              |                     | <b>23.09]</b> |                  |                  |
|         | SARS-CoV-2 2P | Symptomatic vs                      | <b>28.52</b> | <b>[1.49,</b>  | <b>0.026</b> | <b>0.066</b> | 1.47                | [0.87,        | 0.153            | 0.255            |
|         | Spike         | Asymptomatic in PLWH                |              | <b>547.21]</b> |              |              |                     | 2.5]          |                  |                  |

| Isotype | Antigen             | Comparison                          | Response Rate |                        |              |              | Response Magnitudes |                       |                  |                  |
|---------|---------------------|-------------------------------------|---------------|------------------------|--------------|--------------|---------------------|-----------------------|------------------|------------------|
|         |                     |                                     | OR            | 95% CI                 | P-value      | Q-value      | GMR                 | 95% CI                | P-value          | Q-value          |
|         |                     | Hospitalized vs Symptomatic in PLWH | 0.76          | [0.02, 37.51]          | 0.889        | 0.889        | <b>3.89</b>         | <b>[1.48, 10.23]</b>  | <b>0.006</b>     | <b>0.012</b>     |
|         | SARS-CoV-2-NTD      | Symptomatic vs Asymptomatic in PLWH | <b>7.95</b>   | <b>[1.05, 60.29]</b>   | <b>0.045</b> | <b>0.09</b>  | 1.14                | [0.46, 2.84]          | 0.784            | 0.836            |
|         |                     | Hospitalized vs Symptomatic in PLWH | 10.36         | [0.31, 348.67]         | 0.193        | 0.321        | <b>31.39</b>        | <b>[6.75, 145.92]</b> | <b>&lt;0.001</b> | <b>&lt;0.001</b> |
|         | SARS-CoV-2 6P Spike | Symptomatic vs Asymptomatic in PLWH | <b>54.03</b>  | <b>[2.44, 1194.36]</b> | <b>0.012</b> | <b>0.065</b> | 1.17                | [0.53, 2.55]          | 0.7              | 0.836            |
|         |                     | Hospitalized vs Symptomatic in PLWH | 7.97          | [0.11, 567.01]         | 0.34         | 0.486        | <b>16.09</b>        | <b>[4.22, 61.36]</b>  | <b>&lt;0.001</b> | <b>&lt;0.001</b> |
| IgG3    | SARS-CoV-2 RBD      | Symptomatic vs Asymptomatic in PLWH | <b>7.44</b>   | <b>[1.52, 36.46]</b>   | <b>0.013</b> | <b>0.045</b> | 1.08                | [0.64, 1.82]          | 0.768            | 0.854            |
|         |                     | Hospitalized vs Symptomatic in PLWH | 6.82          | [0.38, 122.66]         | 0.193        | 0.296        | 2.45                | [0.94, 6.34]          | 0.066            | 0.164            |

| Isotype                  | Antigen | Comparison                          | Response Rate |                      |              |              | Response Magnitudes |                      |              |              |
|--------------------------|---------|-------------------------------------|---------------|----------------------|--------------|--------------|---------------------|----------------------|--------------|--------------|
|                          |         |                                     | OR            | 95% CI               | P-value      | Q-value      | GMR                 | 95% CI               | P-value      | Q-value      |
| SARS-CoV-2 Nucleoprotein |         | Symptomatic vs Asymptomatic in PLWH | <b>25.18</b>  | <b>[1.2, 526.8]</b>  | <b>0.038</b> | <b>0.094</b> | 1.15                | [0.68, 1.96]         | 0.605        | 0.756        |
|                          |         | Hospitalized vs Symptomatic in PLWH | 0.68          | [0.01, 37.44]        | 0.851        | 0.945        | <b>4.21</b>         | <b>[1.58, 11.23]</b> | <b>0.004</b> | <b>0.04</b>  |
| SARS-CoV-2 2P Spike      |         | Symptomatic vs Asymptomatic in PLWH | <b>44.62</b>  | <b>[2.22, 898.4]</b> | <b>0.013</b> | <b>0.045</b> | 1                   | [0.62, 1.6]          | 0.998        | 0.998        |
|                          |         | Hospitalized vs Symptomatic in PLWH | 0.87          | [0.02, 44.98]        | 0.945        | 0.945        | <b>2.81</b>         | <b>[1.18, 6.66]</b>  | <b>0.019</b> | <b>0.064</b> |
| SARS-CoV-2-NTD           |         | Symptomatic vs Asymptomatic in PLWH | 4.16          | [0.94, 18.52]        | 0.061        | 0.122        | 1.39                | [0.67, 2.9]          | 0.373        | 0.622        |
|                          |         | Hospitalized vs Symptomatic in PLWH | 5.7           | [0.38, 85.06]        | 0.207        | 0.296        | <b>5.3</b>          | <b>[1.41, 19.86]</b> | <b>0.013</b> | <b>0.064</b> |

| Isotype | Antigen             | Comparison                          | Response Rate |                       |              |              | Response Magnitudes |                      |              |              |
|---------|---------------------|-------------------------------------|---------------|-----------------------|--------------|--------------|---------------------|----------------------|--------------|--------------|
|         |                     |                                     | OR            | 95% CI                | P-value      | Q-value      | GMR                 | 95% CI               | P-value      | Q-value      |
|         | SARS-CoV-2 6P Spike | Symptomatic vs Asymptomatic in PLWH | <b>17.91</b>  | <b>[2.58, 124.26]</b> | <b>0.004</b> | <b>0.035</b> | 0.82                | [0.45, 1.47]         | 0.495        | 0.708        |
|         |                     | Hospitalized vs Symptomatic in PLWH | 5.01          | [0.22, 114.8]         | 0.313        | 0.391        | 2.62                | [0.88, 7.79]         | 0.082        | 0.164        |
| IgG     | CoV-2 Nucleoprotein | Symptomatic vs Asymptomatic in PLWH | <b>25.06</b>  | <b>[1.22, 515.38]</b> | <b>0.037</b> | <b>0.115</b> | 1.4                 | [0.59, 3.32]         | 0.441        | 0.529        |
|         |                     | Hospitalized vs Symptomatic in PLWH | 0.35          | [0.01, 16.6]          | 0.596        | 0.738        | 3.32                | [0.75, 14.69]        | 0.114        | 0.227        |
|         | CoV-2 RBD           | Symptomatic vs Asymptomatic in PLWH | <b>25.16</b>  | <b>[1.19, 533.32]</b> | <b>0.038</b> | <b>0.115</b> | 1.02                | [0.49, 2.12]         | 0.959        | 0.959        |
|         |                     | Hospitalized vs Symptomatic in PLWH | 0.51          | [0.01, 27.31]         | 0.738        | 0.738        | <b>9.15</b>         | <b>[2.58, 32.45]</b> | <b>0.001</b> | <b>0.002</b> |



| Isotype | Antigen                  | Comparison                          | Response Rate |                |         |         | Response Magnitudes |                      |              |              |
|---------|--------------------------|-------------------------------------|---------------|----------------|---------|---------|---------------------|----------------------|--------------|--------------|
|         |                          |                                     | OR            | 95% CI         | P-value | Q-value | GMR                 | 95% CI               | P-value      | Q-value      |
|         | CoV-2 2P Spike           | Symptomatic vs Asymptomatic in PLWH | 17.4          | [0.8, 379.67]  | 0.069   | 0.139   | 1.41                | [0.62, 3.19]         | 0.407        | 0.529        |
|         |                          | Hospitalized vs Symptomatic in PLWH | 0.38          | [0.01, 20.77]  | 0.637   | 0.738   | <b>11.9</b>         | <b>[2.86, 49.48]</b> | <b>0.001</b> | <b>0.002</b> |
| IgA     | SARS-CoV-2 RBD           | Symptomatic vs Asymptomatic in PLWH | 3.1           | [0.83, 11.53]  | 0.091   | 0.221   | 1.23                | [0.73, 2.08]         | 0.439        | 0.548        |
|         |                          | Hospitalized vs Symptomatic in PLWH | 11.17         | [0.78, 159.99] | 0.075   | 0.221   | 1.77                | [0.77, 4.1]          | 0.181        | 0.259        |
|         | SARS-CoV-2 Nucleoprotein | Symptomatic vs Asymptomatic in PLWH | 3.44          | [0.69, 17.19]  | 0.133   | 0.221   | <b>2.05</b>         | <b>[1.14, 3.7]</b>   | <b>0.017</b> | <b>0.061</b> |
|         |                          | Hospitalized vs Symptomatic in PLWH | 1.08          | [0.07, 18.01]  | 0.955   | 0.955   | <b>3.08</b>         | <b>[1.06, 8.94]</b>  | <b>0.038</b> | <b>0.096</b> |

| Isotype | Antigen             | Comparison                          | Response Rate |                       |              |              | Response Magnitudes |                      |                  |              |
|---------|---------------------|-------------------------------------|---------------|-----------------------|--------------|--------------|---------------------|----------------------|------------------|--------------|
|         |                     |                                     | OR            | 95% CI                | P-value      | Q-value      | GMR                 | 95% CI               | P-value          | Q-value      |
|         | SARS-CoV-2 2P Spike | Symptomatic vs Asymptomatic in PLWH | 2.57          | [0.66, 10]            | 0.173        | 0.247        | 1.45                | [0.93, 2.27]         | 0.103            | 0.207        |
|         |                     | Hospitalized vs Symptomatic in PLWH | 4.93          | [0.34, 71.7]          | 0.243        | 0.304        | 1.72                | [0.81, 3.65]         | 0.156            | 0.259        |
|         | SARS-CoV-2-NTD      | Symptomatic vs Asymptomatic in PLWH | <b>7.05</b>   | <b>[1.45, 34.29]</b>  | <b>0.016</b> | <b>0.137</b> | 1.01                | [0.51, 1.98]         | 0.984            | 0.984        |
|         |                     | Hospitalized vs Symptomatic in PLWH | 9.27          | [0.57, 151.61]        | 0.118        | 0.221        | <b>8.01</b>         | <b>[2.55, 25.13]</b> | <b>&lt;0.001</b> | <b>0.004</b> |
|         | SARS-CoV-2 6P Spike | Symptomatic vs Asymptomatic in PLWH | <b>27.62</b>  | <b>[1.45, 526.96]</b> | <b>0.027</b> | <b>0.137</b> | 1.03                | [0.6, 1.77]          | 0.917            | 0.984        |
|         |                     | Hospitalized vs Symptomatic in PLWH | 0.31          | [0.01, 13.22]         | 0.538        | 0.598        | <b>3.33</b>         | <b>[1.22, 9.04]</b>  | <b>0.018</b>     | <b>0.061</b> |

67 \*: OR=Odds Ratio, \*: GMR=Geometric Mean Ratio; Bold values are significant (p-value≤0.05 and q-value≤0.2). Response magnitudes include  
68 only positive responders

69 **Supplemental Table 5: Association of HIV serostatus and COVID19 severity with ACE-2 blocking to SARS-CoV-2**  
70 **spike responses adjusting for COVID-19 severity (in the first row only), demographics, pre-existing medical**  
71 **conditions, smoking history, region, and days since SARS-CoV-2 diagnosis**

| Participants | Comparison                      | Response Rate |                |         | Percent Blocking Among Positive Responders |                     |              |
|--------------|---------------------------------|---------------|----------------|---------|--------------------------------------------|---------------------|--------------|
|              |                                 | OR*           | 95% CI         | P-value | OR*                                        | 95% CI              | P-value      |
| All          | PLWH vs PWOH                    | 0.67          | [0.08, 6.12]   | 0.708   | 0.56                                       | [0.22, 1.4]         | 0.219        |
| All          | PLWH vs PWOH in<br>Asymptomatic | 0.9           | [0.07, 12.07]  | 0.935   | 2.11                                       | [0.19, 22.98]       | 0.54         |
|              | PLWH vs PWOH in<br>Symptomatic  | 0.55          | [0.07, 4.14]   | 0.564   | 0.32                                       | [0.07, 1.53]        | 0.153        |
|              | PLWH vs PWOH in<br>Hospitalized | 0.72          | [0.03, 20.08]  | 0.844   | 0.73                                       | [0.22, 2.49]        | 0.617        |
| PWOH         | Symptomatic vs Asymptomatic     | 2.78          | [0.26, 29.35]  | 0.396   | 4.94                                       | [0.8, 30.63]        | 0.086        |
|              | Hospitalized vs Symptomatic     | 6.56          | [0.48, 88.89]  | 0.157   | <b>3.37</b>                                | <b>[1.43, 7.94]</b> | <b>0.005</b> |
| PLWH         | Symptomatic vs Asymptomatic     | 1.54          | [0.13, 18.35]  | 0.735   | 1.59                                       | [0.18, 13.83]       | 0.674        |
|              | Hospitalized vs Symptomatic     | 7.62          | [0.16, 371.69] | 0.306   | 16.18                                      | [0.82, 320.83]      | 0.068        |

72 \*: OR=Odds Ratio, Bold values are significant (p-value≤0.05).

73

74 **Supplemental Table 6: Spearman Correlation of CD4 Counts with Immune Responses<sup>a</sup>**

| Isotype-Antigen            | Correlation Coefficient | P-value |
|----------------------------|-------------------------|---------|
| IgA.Nucleoprotein          | 0.13                    | 0.52    |
| IgA.NTD                    | -0.05                   | 0.83    |
| IgA.SARS-CoV-2 RBD         | 0.02                    | 0.91    |
| IgA.2P Spike               | -0.02                   | 0.92    |
| IgA.6P Spike               | -0.11                   | 0.58    |
| IgG1.Nucleoprotein         | 0.07                    | 0.75    |
| IgG1.NTD                   | -0.19                   | 0.35    |
| IgG1.SARS-CoV-2 RBD        | -0.22                   | 0.27    |
| IgG1.2P Spike              | -0.19                   | 0.34    |
| IgG1.6P Spike              | -0.25                   | 0.22    |
| IgG3.Nucleoprotein         | -0.02                   | 0.93    |
| IgG3.NTD                   | -0.16                   | 0.42    |
| IgG3.SARS-CoV-2 RBD        | -0.21                   | 0.29    |
| IgG3.2P Spike              | -0.13                   | 0.53    |
| IgG3.6P Spike              | -0.25                   | 0.21    |
| MSD IgG.CoV-2 Nucleocapsid | 0.09                    | 0.66    |
| MSD IgG.SARS-CoV-2 RBD     | -0.22                   | 0.28    |
| MSD IgG.2P Spike           | -0.23                   | 0.26    |

|               |       |      |
|---------------|-------|------|
| ACE2.2P Spike | -0.25 | 0.22 |
|---------------|-------|------|

75 <sup>a</sup>26 PLWH had recently available CD4 count data. Significant correlations were defined as  $p \leq 0.05$ .

76

77 **Supplemental Table 7: SARS-CoV-2-specific Immune Responses Stratified by HIV Viral Load Detection Status<sup>a</sup>**

| Isotype | Antigen        | With Detectable VL           | With undetectable VL         | Fisher's Exact Test P-value |
|---------|----------------|------------------------------|------------------------------|-----------------------------|
|         |                | Response Rate(95% CI)        | Response Rate(95% CI)        |                             |
| ACE2    | 2P Spike       | 2/3 = 66.7% (20.8%, 93.8%)   | 21/24 = 87.5% (69.0%, 95.7%) | 0.395                       |
| IgA     | Nucleoprotein  | 2/3 = 66.7% (20.8%, 93.8%)   | 21/24 = 87.5% (69.0%, 95.7%) | 0.395                       |
|         | NTD            | 3/3 = 100.0% (43.9%, 100.0%) | 20/24 = 83.3% (64.1%, 93.3%) | 1                           |
|         | SARS-CoV-2 RBD | 3/3 = 100.0% (43.9%, 100.0%) | 19/24 = 79.2% (59.5%, 90.8%) | 1                           |
|         | 2P Spike       | 3/3 = 100.0% (43.9%, 100.0%) | 20/24 = 83.3% (64.1%, 93.3%) | 1                           |
|         | 6P Spike       | 3/3 = 100.0% (43.9%, 100.0%) | 22/24 = 91.7% (74.2%, 97.7%) | 1                           |
| IgG1    | Nucleoprotein  | 3/3 = 100.0% (43.9%, 100.0%) | 22/24 = 91.7% (74.2%, 97.7%) | 1                           |
|         | NTD            | 3/3 = 100.0% (43.9%, 100.0%) | 21/24 = 87.5% (69.0%, 95.7%) | 1                           |
|         | SARS-CoV-2 RBD | 3/3 = 100.0% (43.9%, 100.0%) | 23/24 = 95.8% (79.8%, 99.3%) | 1                           |
|         | 2P Spike       | 3/3 = 100.0% (43.9%, 100.0%) | 22/24 = 91.7% (74.2%, 97.7%) | 1                           |
|         | 6P Spike       | 3/3 = 100.0% (43.9%, 100.0%) | 22/24 = 91.7% (74.2%, 97.7%) | 1                           |
| IgG3    | Nucleoprotein  | 3/3 = 100.0% (43.9%, 100.0%) | 23/24 = 95.8% (79.8%, 99.3%) | 1                           |
|         | NTD            | 3/3 = 100.0% (43.9%, 100.0%) | 19/24 = 79.2% (59.5%, 90.8%) | 1                           |

|         |                    |                              |                              |   |
|---------|--------------------|------------------------------|------------------------------|---|
|         | SARS-CoV-2 RBD     | 3/3 = 100.0% (43.9%, 100.0%) | 21/24 = 87.5% (69.0%, 95.7%) | 1 |
|         | 2P Spike           | 3/3 = 100.0% (43.9%, 100.0%) | 23/24 = 95.8% (79.8%, 99.3%) | 1 |
|         | 6P Spike           | 3/3 = 100.0% (43.9%, 100.0%) | 21/24 = 87.5% (69.0%, 95.7%) | 1 |
| MSD IgG | SARS-CoV-2 RBD     | 3/3 = 100.0% (43.9%, 100.0%) | 23/24 = 95.8% (79.8%, 99.3%) | 1 |
|         | 2P Spike           | 3/3 = 100.0% (43.9%, 100.0%) | 23/24 = 95.8% (79.8%, 99.3%) | 1 |
|         | CoV-2 Nucleocapsid | 3/3 = 100.0% (43.9%, 100.0%) | 22/24 = 91.7% (74.2%, 97.7%) | 1 |

78 <sup>a</sup>27 PLWH had recently available VL data. Detectable VL was defined as  $\geq 50$  copies/mL and undetectable VL  $< 50$  copies/mL. Significant

79 correlations were defined as  $p \leq 0.05$ .

80

81 **Supplemental Table 8: Association of HIV serostatus and COVID19 severity with ADCP response to SARS-CoV-2**  
 82 **6P Spike adjusting for demographics, pre-existing medical conditions, smoking history, region, and days since**  
 83 **SARS-CoV-2 diagnosis**

| Participants | Comparison                   | Response Magnitude among Positive |                       |              |                  |                     |              |
|--------------|------------------------------|-----------------------------------|-----------------------|--------------|------------------|---------------------|--------------|
|              |                              | Response Rate                     |                       |              | Responders       |                     |              |
|              |                              | OR <sup>*</sup>                   | 95% CI                | P-value      | GMR <sup>†</sup> | 95% CI              | P-value      |
| All          | PLWH vs PWOH                 | 0.76                              | [0.28, 2.3]           | 0.614        | 0.86             | [0.72, 1.03]        | 0.106        |
| All          | PLWH vs PWOH in Asymptomatic | 0.81                              | [0.13, 4.84]          | 0.814        | 0.77             | [0.5, 1.19]         | 0.234        |
|              | PLWH vs PWOH in Symptomatic  | 4.35                              | [0.23, 83.54]         | 0.33         | <b>0.77</b>      | <b>[0.59, 0.99]</b> | <b>0.045</b> |
|              | PLWH vs PWOH in Hospitalized | <b>0.23</b>                       | <b>[0.06, 0.93]</b>   | <b>0.039</b> | 1.02             | [0.78, 1.33]        | 0.894        |
| PWOH         | Symptomatic vs Asymptomatic  | <b>4.44</b>                       | <b>[1.72, 11.44]</b>  | <b>0.002</b> | 1.11             | [0.93, 1.33]        | 0.236        |
|              | Hospitalized vs Symptomatic  | 2.19                              | [0.77, 6.19]          | 0.142        | <b>1.21</b>      | <b>[1.07, 1.38]</b> | <b>0.003</b> |
| PLWH         | Symptomatic vs Asymptomatic  | <b>19.3</b>                       | <b>[1.01, 367.69]</b> | <b>0.049</b> | 0.85             | [0.64, 1.14]        | 0.275        |
|              | Hospitalized vs Symptomatic  | 0.09                              | [0, 3.37]             | 0.195        | 1.24             | [0.71, 2.17]        | 0.449        |

84 †: OR=Odds Ratio, †: GMR=Geometric Mean Ratio; Bold values are significant (p-value≤0.05).

85

86 **Supplemental Table 9:** Sensitivity analysis: Comparison of models adjusting for either the full list of factors (Primary  
87 model: demographics, pre-existing medical conditions, smoking history, region, and days since SARS-CoV-2 diagnosis)  
88 or a truncated list (Sensitivity analysis model: COVID-19 severity (except where this factor is the comparison), days since  
89 SARS-CoV-2 diagnosis, age, sex assigned at birth, and region). Statistical differences are highlighted in the tables below  
90 with addition information in the subheadings. \*: OR=Odds Ratio, +: GMR=Geometric Mean Ratio; Bold values are  
91 significant (p-value≤0.05 and q-value≤0.2)

| <b>Sensitivity Analysis</b>                                                                                                             |                          |              |             |                      |                  |              | <b>Primary Analysis</b> |                      |                  |              |
|-----------------------------------------------------------------------------------------------------------------------------------------|--------------------------|--------------|-------------|----------------------|------------------|--------------|-------------------------|----------------------|------------------|--------------|
| <i>Binding Ab response rates comparison by HIV infection status (PLWH vs PWOH uninfected) overall</i>                                   |                          |              |             |                      |                  |              |                         |                      |                  |              |
| Isotype                                                                                                                                 | Antigen                  | Participants | OR*         | 95% CI               | P-value          | Q-value      | OR*                     | 95% CI               | P-value          | Q-value      |
| <b>IgG1</b>                                                                                                                             | SARS-CoV-2 RBD           | All          | <b>4.28</b> | <b>[1.19, 23.32]</b> | <b>0.023</b>     | <b>0.117</b> | 3.65                    | [0.97, 20.51]        | 0.057            | 0.245        |
| <b>IgG3</b>                                                                                                                             | SARS-CoV-2 RBD           | All          | 2.09        | [0.85, 5.91]         | 0.114            | 0.19         | <b>2.81</b>             | <b>[1.05, 8.68]</b>  | <b>0.039</b>     | <b>0.097</b> |
|                                                                                                                                         | SARS-CoV-2 6P            | All          | 2.29        | [0.84, 7.34]         | 0.11             | 0.19         | <b>3.23</b>             | <b>[1.09, 11.39]</b> | <b>0.033</b>     | <b>0.097</b> |
|                                                                                                                                         | Spike                    |              |             |                      |                  |              |                         |                      |                  |              |
| <i>Binding Ab response magnitudes comparison by HIV infection status (PLWH vs PWOH uninfected) overall</i>                              |                          |              |             |                      |                  |              |                         |                      |                  |              |
| Isotype                                                                                                                                 | Antigen                  | Participants | GMR+        | 95% CI               | P-value          | Q-value      | GMR+                    | 95% CI               | P-value          | Q-value      |
| <b>IgG1</b>                                                                                                                             | SARS-CoV-2 RBD           | All          | <b>0.66</b> | <b>[0.44, 0.99]</b>  | <b>0.046</b>     | <b>0.116</b> | 0.75                    | [0.5, 1.14]          | 0.184            | 0.307        |
|                                                                                                                                         | SARS-CoV-2 6P            | All          | <b>0.64</b> | <b>[0.41, 0.98]</b>  | <b>0.042</b>     | <b>0.116</b> | <b>0.63</b>             | <b>[0.4, 1]</b>      | <b>0.05</b>      | <b>0.138</b> |
|                                                                                                                                         | Spike                    |              |             |                      |                  |              |                         |                      |                  |              |
| <b>IgG</b>                                                                                                                              | CoV-2 RBD                | All          | 0.67        | [0.45, 1.01]         | 0.058            | 0.173        | <b>0.63</b>             | <b>[0.42, 0.96]</b>  | <b>0.031</b>     | <b>0.093</b> |
| <i>Binding Ab response magnitudes comparison by HIV infection status (PLWH vs PWOH uninfected) stratified by peak COVID-19 severity</i> |                          |              |             |                      |                  |              |                         |                      |                  |              |
| Isotype                                                                                                                                 | Antigen                  | Participants | GMR+        | 95% CI               | P-value          | Q-value      | GMR+                    | 95% CI               | P-value          | Q-value      |
| <b>IgG1</b>                                                                                                                             | SARS-CoV-2 RBD           | Asymptomatic | 1.83        | [0.69, 4.84]         | 0.227            | 0.496        | <b>2.7</b>              | <b>[1.02, 7.15]</b>  | <b>0.046</b>     | <b>0.138</b> |
|                                                                                                                                         |                          | Symptomatic  | <b>0.35</b> | <b>[0.19, 0.67]</b>  | <b>0.001</b>     | <b>0.008</b> | <b>0.41</b>             | <b>[0.22, 0.77]</b>  | <b>0.005</b>     | <b>0.02</b>  |
|                                                                                                                                         | SARS-CoV-2 Nucleoprotein | Symptomatic  | <b>0.39</b> | <b>[0.21, 0.74]</b>  | <b>0.004</b>     | <b>0.014</b> | <b>0.38</b>             | <b>[0.2, 0.74]</b>   | <b>0.004</b>     | <b>0.02</b>  |
|                                                                                                                                         | SARS-CoV-2-NTD           | Symptomatic  | <b>0.27</b> | <b>[0.12, 0.61]</b>  | <b>0.002</b>     | <b>0.008</b> | <b>0.23</b>             | <b>[0.1, 0.51]</b>   | <b>&lt;0.001</b> | <b>0.003</b> |
|                                                                                                                                         | SARS-CoV-2 6P            | Symptomatic  | <b>0.26</b> | <b>[0.13, 0.49]</b>  | <b>&lt;0.001</b> | <b>0.001</b> | <b>0.25</b>             | <b>[0.13, 0.5]</b>   | <b>&lt;0.001</b> | <b>0.001</b> |
|                                                                                                                                         | Spike                    |              |             |                      |                  |              |                         |                      |                  |              |
| <b>IgG</b>                                                                                                                              | CoV-2 RBD                | Symptomatic  | <b>0.41</b> | <b>[0.22, 0.76]</b>  | <b>0.004</b>     | <b>0.028</b> | <b>0.43</b>             | <b>[0.23, 0.78]</b>  | <b>0.006</b>     | <b>0.053</b> |
|                                                                                                                                         | CoV-2 2P Spike           | Symptomatic  | <b>0.38</b> | <b>[0.19, 0.76]</b>  | <b>0.006</b>     | <b>0.028</b> | <b>0.41</b>             | <b>[0.21, 0.82]</b>  | <b>0.012</b>     | <b>0.054</b> |

*Binding Ab response rates comparison between peak COVID-19 severity stratified by HIV infection status*



| Isotype    | Antigen             | Comparison                          | OR*         | 95% CI               | P-value      | Q-value      | OR*          | 95% CI                | P-value      | Q-value      |
|------------|---------------------|-------------------------------------|-------------|----------------------|--------------|--------------|--------------|-----------------------|--------------|--------------|
| <b>IgG</b> | CoV-2 Nucleoprotein | Symptomatic vs Asymptomatic in PWOH | <b>4.85</b> | <b>[1.43, 16.48]</b> | <b>0.011</b> | <b>0.04</b>  | 3.56         | [0.95, 13.35]         | 0.059        | 0.178        |
|            |                     | Symptomatic vs Asymptomatic in PLWH | 16.1        | [0.79, 328.28]       | 0.071        | 0.218        | <b>25.06</b> | <b>[1.22, 515.38]</b> | <b>0.037</b> | <b>0.115</b> |
|            | CoV-2 RBD           | Symptomatic vs Asymptomatic in PWOH | <b>4.72</b> | <b>[1.38, 16.1]</b>  | <b>0.013</b> | <b>0.04</b>  | 3.6          | [0.96, 13.54]         | 0.058        | 0.178        |
|            | CoV-2 2P Spike      | Symptomatic vs Asymptomatic in PWOH | <b>4.09</b> | <b>[1.07, 15.64]</b> | <b>0.04</b>  | <b>0.079</b> | 3.13         | [0.74, 13.29]         | 0.122        | 0.244        |
| <b>IgG</b> | CoV-2 Nucleoprotein | Symptomatic vs Asymptomatic in PLWH | 16.1        | [0.79, 328.28]       | 0.071        | 0.218        | <b>25.06</b> | <b>[1.22, 515.38]</b> | <b>0.037</b> | <b>0.115</b> |
|            | CoV-2 RBD           | Symptomatic vs Asymptomatic in PLWH | 15.82       | [0.78, 322.63]       | 0.073        | 0.218        | <b>25.16</b> | <b>[1.19, 533.32]</b> | <b>0.038</b> | <b>0.115</b> |

**Binding Ab response magnitudes comparison between peak COVID-19 severity stratified by HIV infection status**

| Isotype    | Antigen             | Comparison                          | GMR*         | 95% CI               | P-value          | Q-value          | GMR*        | 95% CI               | P-value      | Q-value      |
|------------|---------------------|-------------------------------------|--------------|----------------------|------------------|------------------|-------------|----------------------|--------------|--------------|
| <b>IgG</b> | CoV-2 Nucleoprotein | Hospitalized vs Symptomatic in PLWH | <b>5.15</b>  | <b>[1.2, 22.18]</b>  | <b>0.028</b>     | <b>0.056</b>     | 3.32        | [0.75, 14.69]        | 0.114        | 0.227        |
|            |                     | Hospitalized vs Symptomatic in PLWH | <b>12.23</b> | <b>[3.46, 43.25]</b> | <b>&lt;0.001</b> | <b>&lt;0.001</b> | <b>9.15</b> | <b>[2.58, 32.45]</b> | <b>0.001</b> | <b>0.002</b> |
|            | CoV-2 2P Spike      | Hospitalized vs Symptomatic in PLWH | <b>16.88</b> | <b>[4.07, 69.95]</b> | <b>&lt;0.001</b> | <b>&lt;0.001</b> | <b>11.9</b> | <b>[2.86, 49.48]</b> | <b>0.001</b> | <b>0.002</b> |

**Percent ACE-2 receptor blocking comparison between peak COVID-19 severity stratified by HIV infection status**

| Marker       | Participants | Comparison                  | OR*          | 95% CI                | P-value      | OR*         | 95% CI              | P-value      |
|--------------|--------------|-----------------------------|--------------|-----------------------|--------------|-------------|---------------------|--------------|
| <b>ACE-2</b> | PWOH         | Hospitalized vs Symptomatic | <b>3.18</b>  | <b>[1.35, 7.52]</b>   | <b>0.008</b> | <b>3.37</b> | <b>[1.43, 7.94]</b> | <b>0.005</b> |
|              | PLWH         | Hospitalized vs Symptomatic | <b>18.32</b> | <b>[0.99, 340.46]</b> | <b>0.051</b> | 16.18       | [0.82, 320.83]      | 0.068        |

**ADCP response rates comparison by HIV infection status and peak COVID-19 severity**

| Marker      | Participants | Comparison                  | OR*         | 95% CI              | P-value      | OR*         | 95% CI                | P-value      |
|-------------|--------------|-----------------------------|-------------|---------------------|--------------|-------------|-----------------------|--------------|
| <b>ADCP</b> | Hospitalized | PLWH vs PWOH                | <b>0.23</b> | <b>[0.06, 0.91]</b> | <b>0.036</b> | <b>0.23</b> | <b>[0.06, 0.93]</b>   | <b>0.039</b> |
|             | PWOH         | Symptomatic vs Asymptomatic | <b>4.53</b> | <b>[1.82, 11.3]</b> | <b>0.001</b> | <b>4.44</b> | <b>[1.72, 11.44]</b>  | <b>0.002</b> |
|             | PLWH         | Symptomatic vs Asymptomatic | 17.29       | [0.9, 331.01]       | 0.058        | <b>19.3</b> | <b>[1.01, 367.69]</b> | <b>0.049</b> |

**ADCP response magnitudes comparison by HIV infection status and peak COVID-19 severity**

| Marker      | Participants | Comparison                  | GMR <sup>+</sup> | 95% CI             | P-value      | GMR <sup>+</sup> | 95% CI              | P-value      |
|-------------|--------------|-----------------------------|------------------|--------------------|--------------|------------------|---------------------|--------------|
| <b>ADCP</b> | Symptomatic  | PLWH vs PWOH                | 0.78             | [0.6, 1.01]        | 0.061        | <b>0.77</b>      | <b>[0.59, 0.99]</b> | <b>0.045</b> |
|             | PWOH         | Hospitalized vs Symptomatic | <b>1.23</b>      | <b>[1.08, 1.4]</b> | <b>0.001</b> | <b>1.21</b>      | <b>[1.07, 1.38]</b> | <b>0.003</b> |
|             | PLWH         | Hospitalized vs Symptomatic | 1.24             | [0.71, 2.17]       | 0.447        | 1.24             | [0.71, 2.17]        | 0.449        |

93

94

95 **Supplemental Table 10: BAMA and ADCP antigen panels**

| Antigen Name (short) | Antigen Name (full)             | Source                                                                    |
|----------------------|---------------------------------|---------------------------------------------------------------------------|
| RBD                  | SARS-CoV-2 DB-His               | Neil King/Lauren Baker, Institute for Protein Design, Seattle, Washington |
| 2P Spike             | SARS-CoV-2 spike (PreS Nexelis) | Nexelis                                                                   |
| 2P Spike             | 2019-nCoV S/293F                | Duke Protein Production Facility                                          |
| 6P Spike             | SARS-CoV-2 S Hexapro_293F_PPF   | Duke Protein Production Facility                                          |
| Nucleoprotein        | SARS-CoV-2 Nucleoprotein His    | Cedarlane, Burlington, NC; Cat# REC31812-500                              |
| NTD                  | SARS-CoV-2-NTD-AVI Biotin       | NIH/NIAID/VRC, Peter Kwong                                                |

96

97

98
